# Supplementary material for: Characterization of tryptophan oxidation affecting D1 degradation by FtsH in the photosystem II quality control of chloroplasts
Source: eLife journal article supplement (doi:10.7554/elife.88822), 2023-07-26
Supplement: fig1-data1 [file Figure 1 – source data 1 PSII oxidation in Chlamy.xlsx]

## Sheet: Sheet1
Figure 1 – source data 1. Trp oxidation in Chlamydomonas PSII core proteins
		type and position of oxidation
				1st			2nd
Accession	Protein	# of ox	position	a.a.	codon	type	a.a.	codon	type	range	Peptide Modified Sequence
DAA00922.1_20	D1	0	-	-		-	-	-	-	9-16	ENSSLWAR
		1	14	W	14	OIA	-	-	-	9-16	ENSSLW[+16]AR
		1	14	W	14	NFK	-	-	-	9-16	ENSSLW[+32]AR
		1	14	W	14	KYN	-	-	-	9-16	ENSSLW[+4]AR
		0	-	-	-	-	-	-	-	17-27	FCcamEWITSTENR
		1	20	W	20	OIA	-	-	-	17-27	FCcamEW[+16]ITSTENR	Protein
		1	20	W	20	NFK	-	-	-	17-27	FCcamEW[+32]ITSTENR	[gene=psbA] [protein=photosystem II reaction center protein D1]
		1	20	W	20	KYN	-	-	-	17-27	FCcamEW[+4]ITSTENR	[gene=psbA] [protein=photosystem II reaction center protein D1]
		0	-	-	-	-	-	-	-	130-136	EWELSFR	[gene=psbA] [protein=photosystem II reaction center protein D1]
		1	131	W	131	OIA	-	-	-	130-136	EW[+16]ELSFR	[gene=psbA] [protein=photosystem II reaction center protein D1]
		1	131	W	131	NFK	-	-	-	130-136	EW[+32]ELSFR	[gene=psbA] [protein=photosystem II reaction center protein D1]
		1	131	W	131	KYN	-	-	-	130-136	EW[+4]ELSFR	[gene=psbA] [protein=photosystem II reaction center protein D1]
		0	-	-	-	-	-	-	-	313-323	VLNTWADIINR	[gene=psbA] [protein=photosystem II reaction center protein D1]
		1	317	W	317	OIA	-	-	-	313-323	VLNTW[+16]ADIINR	[gene=psbA] [protein=photosystem II reaction center protein D1]
		1	317	W	317	NFK	-	-	-	313-323	VLNTW[+32]ADIINR	[gene=psbA] [protein=photosystem II reaction center protein D1]
		1	317	W	317	KYN	-	-	-	313-323	VLNTW[+4]ADIINR	[gene=psbA] [protein=photosystem II reaction center protein D1]
DAA00964.1_63	D2	0	-	-	-	-	-	-	-	13-23	TWFDDADDWLR
		1	14	W	14	OIA	-	-	-	13-23	TW[+16]FDDADDWLR
		1	14	W	14	NFK	-	-	-	13-23	TW[+32]FDDADDWLR
		1	14	W	14	KYN	-	-	-	13-23	TW[+4]FDDADDWLR
		1	21	-	-	-	W	21	OIA	13-23	TWFDDADDW[+16]LR
		1	21	-	-	-	W	21	NFK	13-23	TWFDDADDW[+32]LR
		1	21	-	-	-	W	21	KYN	13-23	TWFDDADDW[+4]LR
		2	14, 21	W	14	OIA	W	21	KYN	13-23	TW[+16]FDDADDW[+4]LR
		2	14, 21	W	14	NFK	W	21	NFK	13-23	TW[+32]FDDADDW[+32]LR
		2	14, 21	W	14	NFK	W	21	KYN	13-23	TW[+32]FDDADDW[+4]LR
		2	14, 21	W	14	KYN	W	21	NFK	13-23	TW[+4]FDDADDW[+32]LR
		2	14, 21	W	14	KYN	W	21	KYN	13-23	TW[+4]FDDADDW[+4]LR
		0	-	-	-	-	-	-	-	327-338	AWMAAQDQPHER
		1	328	W	328	OIA	-	-	-	327-338	AW[+16]MAAQDQPHER
		1	328	W	328	NFK	-	-	-	327-338	AW[+32]MAAQDQPHER
		1	328	W	328	KYN	-	-	-	327-338	AW[+4]MAAQDQPHER
		1	329	-	-	-	M	329	Oxidation	327-338	AWMoxAAQDQPHER
		2	328, 329	W	328	OIA	M	329	Oxidation	327-338	AW[+16]MoxAAQDQPHER
		2	328, 329	W	328	NFK	M	329	Oxidation	327-338	AW[+32]MoxAAQDQPHER
		2	328, 329	W	328	KYN	M	329	Oxidation	327-338	AW[+4]MoxAAQDQPHER
DAA00966.1_65	CP43	0	-	-	-	-	-	-	-	15-29	DQETTGFAWWSGNAR	[gene=psbB] [protein=photosystem II P680 chlorophyll A apoprotein] [protein_id=DAA00933.1] [location=complement(80277..81803)]
		1	23	W	23	OIA	-	-	-	15-29	DQETTGFAW[+16]WSGNAR	[gene=psbC] [protein=photosystem II 44 kDa reaction center protein] [protein_id=DAA00966.1] [location=187025..188410]
		1	23	W	23	NFK	-	-	-	15-29	DQETTGFAW[+32]WSGNAR
		1	23	W	23	KYN	-	-	-	15-29	DQETTGFAW[+4]WSGNAR
		1	24	-	-	-	W	24	OIA	15-29	DQETTGFAWW[+16]SGNAR
		1	24	-	-	-	W	24	NFK	15-29	DQETTGFAWW[+32]SGNAR
		1	24	-	-	-	W	24	KYN	15-29	DQETTGFAWW[+4]SGNAR
		2	23, 24	W	23	OIA	W	24	OIA	15-29	DQETTGFAW[+16]W[+16]SGNAR
		2	23, 24	W	23	OIA	W	24	NFK	15-29	DQETTGFAW[+16]W[+32]SGNAR
		2	23, 24	W	23	NFK	W	24	NFK	15-29	DQETTGFAW[+32]W[+32]SGNAR
		2	23, 24	W	23	KYN	W	24	KYN	15-29	DQETTGFAW[+4]W[+4]SGNAR
		0	-	-	-	-	-	-	-	167-185	AMYFGGVYDTWAPGGGDVR
		1	168	M	168	Oxidation	-	-	-	167-185	AMoxYFGGVYDTWAPGGGDVR
		1	177	-	-	-	W	177	OIA	167-185	AMYFGGVYDTW[+16]APGGGDVR
		1	168, 177	M	168	Oxidation	W	177	OIA	167-185	AMoxYFGGVYDTW[+16]APGGGDVR
		1	168, 177	M	168	Oxidation	W	177	NFK	167-185	AMoxYFGGVYDTW[+32]APGGGDVR
		1	168, 177	M	168	Oxidation	W	177	KYN	167-185	AMoxYFGGVYDTW[+4]APGGGDVR
		0	-	-	-	-	-	-	-	351-358	GPWLEPLR
		1	353	W	353	OIA	-	-	-	351-358	GPW[+16]LEPLR
		1	353	W	353	NFK	-	-	-	351-358	GPW[+32]LEPLR
		1	353	W	353	KYN	-	-	-	351-358	GPW[+4]LEPLR
		0	-	-	-	-	-	-	-	370-378	NDIQPWQER
		1	375	W	375	OIA	-	-	-	370-378	NDIQPW[+16]QER
		1	375	W	375	NFK	-	-	-	370-378	NDIQPW[+32]QER
		1	375	W	375	KYN	-	-	-	370-378	NDIQPW[+4]QER
DAA00933.1_31	CP47	0	-	-	-	-	-	-	-	273-286	YQWDQGFFQQEIQK
		1	275	W	275	OIA	-	-	-	273-286	YQW[+16]DQGFFQQEIQK
		1	275	W	275	NFK	-	-	-	273-286	YQW[+32]DQGFFQQEIQK
		1	275	W	275	KYN	-	-	-	273-286	YQW[+4]DQGFFQQEIQK
		0	-	-	-	-	-	-	-	288-304	VQASLAEGASLSDAWSR
		1	302	W	302	OIA	-	-	-	288-304	VQASLAEGASLSDAW[+16]SR
		1	302	W	302	NFK	-	-	-	288-304	VQASLAEGASLSDAW[+32]SR
		1	302	W	302	KYN	-	-	-	288-304	VQASLAEGASLSDAW[+4]SR
		0	-	-	-	-	-	-	-	327-347	TGAMNSGDGIAVGWLGHASFK
		1	320	M	320	Oxidation	-	-	-	327-347	TGAMoxNSGDGIAVGWLGHASFK
		1	340	-	-	-	W	340	OIA	327-347	TGAMNSGDGIAVGW[+16]LGHASFK
		1	340	-	-	-	W	340	NFK	327-347	TGAMNSGDGIAVGW[+20]LGHASFK
		2	320, 340	M	320	Oxidation	W	340	OIA	327-347	TGAMoxNSGDGIAVGW[+16]LGHASFK
		2	320, 340	M	320	Oxidation	W	340	NFK	327-347	TGAMoxNSGDGIAVGW[+32]LGHASFK
		2	320, 340	M	320	Oxidation	W	340	KYN	327-347	TGAMoxNSGDGIAVGW[+4]LGHASFK
												[gene=psbD] [protein=photosystem II reaction center protein D2] [protein_id=DAA00964.1] [location=complement(174574..175632)]
												[gene=psbD] [protein=photosystem II reaction center protein D2] [protein_id=DAA00964.1] [location=complement(174574..175632)]
												[gene=psbD] [protein=photosystem II reaction center protein D2] [protein_id=DAA00964.1] [location=complement(174574..175632)]
												[gene=psbD] [protein=photosystem II reaction center protein D2] [protein_id=DAA00964.1] [location=complement(174574..175632)]
