# Supplementary material for: Characterization of tryptophan oxidation affecting D1 degradation by FtsH in the photosystem II quality control of chloroplasts
Source: eLife journal article supplement (doi:10.7554/elife.88822), 2023-07-26
Supplement: fig4-data1 [file D1 degradation rate.xlsx]

## Sheet: GL with Chl
GL with Chl	1st			2nd			3rd			4th			5th			6th
Control	0	7294	1	0	7529	1	0	4183	1	0	15966.1	1	0	5887	1	0	4635	1
	30	6874	0.942418	30	7241	0.961748	30	3512	0.839589	30	15396.4	0.964318	30	6010	1.02089	30	5093	1.09881
	60	6300	0.863724	60	6776	0.899987	60	3882	0.928042	60	14439.6	0.904389	60	5754	0.977408	60	5045	1.08846
	90	6286	0.861804	90	6602	0.876876	90	4174	0.997848	90	13322.3	0.834413	90	5825	0.989468	90	4524	0.976052
W14F	0	4498	1	0	5862	1	0	4467	1	0	10083.1	1	0	5709	1	0	4533	1
	30	4257	0.946421	30	5666	0.966564	30	4281	0.958361	30	9780.23	0.969967	30	5275	0.92398	30	4591	1.0128
	60	4354	0.967986	60	5339	0.910781	60	4277	0.957466	60	9649.81	0.957033	60	4869	0.852864	60	4341	0.957644
	90	4479	0.995776	90	5283	0.901228	90	4118	0.921872	90	9215.4	0.913949	90	4856	0.850587	90	4233	0.933819
W317F	0	6034	1	0	7544	1	0	4769	1	0	8565.28	1	0	7025	1	0	4747	1
	30	5598	0.927743	30	7426	0.984358	30	4730	0.991822	30	9571.1	1.11743	30	6362	0.905623	30	4504	0.94881
	60	5082	0.842227	60	7733	1.02505	60	4530	0.949885	60	9913.1	1.15736	60	5557	0.791032	60	4476	0.942911
	90	4831	0.80063	90	7287	0.965933	90	4782	1.00273	90	10644	1.24269	90	4987	0.709893	90	4104	0.864546
DF	0	3984	1	0	5313	1	0	3776	1	0	11326.1	1	0	3526	1	0	4442	1
	30	3718	0.933233	30	5023	0.945417	30	3873	1.02569	30	11855	1.0467	30	3963	1.12394	30	4429	0.997073
	60	3348	0.840361	60	4919	0.925842	60	3754	0.994174	60	10897.3	0.962144	60	4284	1.21497	60	4683	1.05425
	90	3013	0.756275	90	4813	0.905891	90	3315	0.877913	90	10994.3	0.970704	90	4161	1.18009	90	4987	1.12269
		1	2	3	4	5	6	AVERAGE	STDEV	Ttest
Control	0	1	1	1	1	1	1	1	0
	30	0.942418	0.961748	0.839589	0.964318	1.02089	1.09881	0.971297	0.0860711			Control	W14F	W317F	W14FW317F
	60	0.863724	0.899987	0.928042	0.904389	0.977408	1.08846	0.943668	0.0802353		0	1	1	1	1
	90	0.861804	0.876876	0.997848	0.834413	0.989468	0.976052	0.922744	0.0728757		30	0.971297	0.963015	0.979298	1.01201
W14F	0	1	1	1	1	1	1	1	0	#DIV/0!	60	0.943668	0.933962	0.951411	0.998625
	30	0.946421	0.966564	0.958361	0.969967	0.92398	1.0128	0.963015	0.0295288	0.805596	90	0.922744	0.919538	0.93107	0.968928
	60	0.967986	0.910781	0.957466	0.957033	0.852864	0.957644	0.933962	0.0445362	0.815433
	90	0.995776	0.901228	0.921872	0.913949	0.850587	0.933819	0.919538	0.0472067	0.94142		Control	W14F	W317F	W14FW317F
W317F	0	1	1	1	1	1	1	1	0	#DIV/0!	0	0	0	0	0
	30	0.927743	0.984358	0.991822	1.11743	0.905623	0.94881	0.979298	0.0752046	0.884871	30	0.0860711	0.0295288	0.0752046	0.0704007
	60	0.842227	1.02505	0.949885	1.15736	0.791032	0.942911	0.951411	0.130809	0.912957	60	0.0802353	0.0445362	0.130809	0.127747
	90	0.80063	0.965933	1.00273	1.24269	0.709893	0.864546	0.93107	0.186449	0.933294	90	0.0728757	0.0472067	0.186449	0.158565
DF	0	1	1	1	1	1	1	1	0	#DIV/0!
	30	0.933233	0.945417	1.02569	1.0467	1.12394	0.997073	1.01201	0.0704007	0.376394
	60	0.840361	0.925842	0.994174	0.962144	1.21497	1.05425	0.998625	0.127747	0.229553
	90	0.756275	0.905891	0.877913	0.970704	1.18009	1.12269	0.968928	0.158565	0.437535

## Sheet: GL without Chl
GL without Chl	1st			2nd			3rd
Control	0	5198	1	0	4288	1	0	16517.1	1
	30	5285	1.01674	30	4241	0.989039	30	16524.1	1.00042
	60	5187	0.997884	60	4735	1.10424	60	15765.4	0.954489
	90	5533	1.06445	90	4576	1.06716	90	15425.5	0.933908
W14F	0	4987	1	0	4018	1	0	12185.4	1
	30	4454	0.893122	30	4451	1.10777	30	12565.8	1.03122
	60	4953	0.993182	60	4556	1.1339	60	11802.7	0.968597
	90	5122	1.02707	90	4539	1.12967	90	11884.1	0.975278
W317F	0	4601	1	0	5524	1	0	10185	1
	30	5090	1.10628	30	5685	1.02915	30	10519.4	1.03283
	60	5402	1.17409	60	5821	1.05377	60	12020.1	1.18018
	90	5056	1.09889	90	6009	1.0878	90	10168.2	0.998355
DF	0	4849	1	0	5240	1	0	11110.6	1
	30	4605	0.94968	30	5242	1.00038	30	11783.9	1.06059
	60	5019	1.03506	60	5284	1.0084	60	10834.3	0.975128
	90	4909	1.01237	90	5054	0.964504	90	11388.7	1.02503
		1	2	3	4	5	AVERAGE	STDEV	Ttest
Control	0	1	1	1			1	0
	30	1.01674	0.989039	1.00042			1.00207	0.0139221
	60	0.997884	1.10424	0.954489			1.01887	0.0770522
	90	1.06445	1.06716	0.933908			1.02184	0.0761637				Control	W14F	W317F	W14FW317F
W14F	0	1	1	1			1	0	#DIV/0!		0	1	1	1	1
	30	0.893122	1.10777	1.03122			1.0107	0.108783	0.914088		30	1.00207	1.0107	1.05609	1.00355
	60	0.993182	1.1339	0.968597			1.03189	0.0891903	0.3202		60	1.01887	1.03189	1.13601	1.00619
	90	1.02707	1.12967	0.975278			1.04401	0.0785749	0.541633		90	1.02184	1.04401	1.06168	1.00064
W317F	0	1	1	1			1	0	#DIV/0!
	30	1.10628	1.02915	1.03283			1.05609	0.0435087	0.0944868			Control	W14F	W317F	W14FW317F
	60	1.17409	1.05377	1.18018			1.13601	0.0712928	0.302168		0	0	0	0	0
	90	1.09889	1.0878	0.998355			1.06168	0.0551225	0.09118		30	0.0139221	0.108783	0.0435087	0.0555251
DF	0	1	1	1			1	0	#DIV/0!		60	0.0770522	0.0891903	0.0712928	0.030026
	30	0.94968	1.00038	1.06059			1.00355	0.0555251	0.971647		90	0.0761637	0.0785749	0.0551225	0.0319255
	60	1.03506	1.0084	0.975128			1.00619	0.030026	0.79058
	90	1.01237	0.964504	1.02503			1.00064	0.0319255	0.749852

## Sheet: HL with Chl
HL with Chl	1st			2nd			3rd			4th
Control	0	10195	1	0	9659	1	0	4387	1	0	16156.2	1
	30	10405	1.0206	30	7814	0.808986	30	4293	0.978573	30	15863.5	0.981883
	60	9742	0.955566	60	7462	0.772544	60	3399	0.774789	60	15177.3	0.939412
	90	9146	0.897106	90	7272	0.752873	90	3266	0.744472	90	10613.1	0.656907
W14F	0	9442	1	0	8326	1	0	4038	1	0	12594.5	1
	30	8376	0.8871	30	7199	0.864641	30	3405	0.843239	30	10551	0.837744
	60	6960	0.737132	60	5943	0.713788	60	3213	0.795691	60	7207.93	0.572306
	90	6120	0.648168	90	5413	0.650132	90	2474	0.61268	90	5869.4	0.466027
W317F	0	10395	1	0	6934	1	0	3879	1	0	10757.9	1
	30	9610	0.924483	30	6809	0.981973	30	4948	1.27559	30	9416.93	0.875348
	60	7875	0.757576	60	5983	0.86285	60	4089	1.05414	60	7747.1	0.720129
	90	7373	0.709283	90	5957	0.8591	90	3763	0.970095	90	6845.03	0.636278
DF	0	8443	1	0	7597	1	0	5372	1	0	10000.2	1
	30	7137	0.845316	30	6309	0.830459	30	4645	0.864669	30	7397.03	0.739692
	60	5343	0.632832	60	5331	0.701724	60	3865	0.719471	60	5480.74	0.548066
	90	3381	0.40045	90	4126	0.543109	90	2871	0.534438	90	4081.91	0.408185
		1	2	3	4	5	AVERAGE	STDEV	Ttest
Control	0	1	1	1	1		1	0
	30	1.0206	0.808986	0.978573	0.981883		0.94751	0.0942993
	60	0.955566	0.772544	0.774789	0.939412		0.860578	0.100577				Control	W14F	W317F	W14FW317F
	90	0.897106	0.752873	0.744472	0.656907		0.76284	0.0994751			0	1	1	1	1
W14F	0	1	1	1	1		1	0	#DIV/0!		30	0.94751	0.858181	1.01435	0.820034
	30	0.8871	0.864641	0.843239	0.837744		0.858181	0.0225016	0.162025		60	0.860578	0.704729	0.848673	0.650523
	60	0.737132	0.713788	0.795691	0.572306		0.704729	0.0947662	0.168413		90	0.76284	0.594252	0.793689	0.471545
	90	0.648168	0.650132	0.61268	0.466027		0.594252	0.0871984	0.0138634
W317F	0	1	1	1	1		1	0	#DIV/0!			Control	W14F	W317F	W14FW317F
	30	0.924483	0.981973	1.27559	0.875348		1.01435	0.179528	0.553051		0	0	0	0	0
	60	0.757576	0.86285	1.05414	0.720129		0.848673	0.14971	0.927256		30	0.0942993	0.0225016	0.179528	0.0553623
	90	0.709283	0.8591	0.970095	0.636278		0.793689	0.149778	0.750558		60	0.100577	0.0947662	0.14971	0.0778587
DF	0	1	1	1	1		1	0	#DIV/0!		90	0.0994751	0.0871984	0.149778	0.077773
	30	0.845316	0.830459	0.864669	0.739692		0.820034	0.0553623	0.107841
	60	0.632832	0.701724	0.719471	0.548066		0.650523	0.0778587	0.0924547
	90	0.40045	0.543109	0.534438	0.408185		0.471545	0.077773	0.0243575

## Sheet: HL without Chl
HL with Chl	1st			2nd			3rd			4th
Control	0	6541	1	0	4457	1	0	3213	1	0	15005.9	1
	30	6309	0.964531	30	4796	1.07606	30	2951	0.918456	30	14000.1	0.932979
	60	6528	0.998013	60	5094	1.14292	60	3036	0.944911	60	12404.7	0.82666
	90	6458	0.987311	90	5054	1.13395	90	2901	0.902894	90	12307.4	0.820176
W14F	0	5987	1	0	5128	1	0	3581	1	0	13510.9	1
	30	5063	0.845666	30	4403	0.858619	30	3044	0.850042	30	11923.3	0.882499
	60	4285	0.715717	60	4030	0.785881	60	2750	0.767942	60	7361.83	0.544883
	90	3790	0.633038	90	3538	0.689938	90	2602	0.726613	90	5778.71	0.427709
W317F	0	5068	1	0	4749	1	0	4405	1	0	8067.95	1
	30	4778	0.942778	30	3980	0.838071	30	4142	0.940295	30	8521.95	1.05627
	60	4405	0.869179	60	4016	0.845652	60	4180	0.948922	60	9858.49	1.22193
	90	4318	0.852013	90	4088	0.860813	90	4159	0.944154	90	9253.08	1.14689
DF	0	3909	1	0	4445	1	0	3998	1	0	8480.83	1
	30	3658	0.935789	30	4367	0.982452	30	3524	0.881441	30	6711.71	0.791398
	60	3275	0.83781	60	3831	0.861867	60	2830	0.707854	60	5807.59	0.68479
	90	2088	0.534152	90	3094	0.696063	90	2488	0.622311	90	4787.18	0.56447
		1	2	3	4	5	AVERAGE	STDEV	Ttest
Control	0	1	1	1	1		1	0
	30	0.964531	1.07606	0.918456	0.932979		0.973007	0.0713438
	60	0.998013	1.14292	0.944911	0.82666		0.978126	0.131147
	90	0.987311	1.13395	0.902894	0.820176		0.961082	0.133928				Control	W14F	W317F	W14FW317F
W14F	0	1	1	1	1		1	0	#DIV/0!		0	1	1	1	1
	30	0.845666	0.858619	0.850042	0.882499		0.859207	0.0164341	0.055949		30	0.973007	0.859207	0.944354	0.89777
	60	0.715717	0.785881	0.767942	0.544883		0.703606	0.109921	0.00507066		60	0.978126	0.703606	0.971421	0.77308
	90	0.633038	0.689938	0.726613	0.427709		0.619324	0.133419	0.00982394		90	0.961082	0.619324	0.950968	0.604249
W317F	0	1	1	1	1		1	0	#DIV/0!
	30	0.942778	0.838071	0.940295	1.05627		0.944354	0.0891453	0.731609			Control	W14F	W317F	W14FW317F
	60	0.869179	0.845652	0.948922	1.22193		0.971421	0.172755	0.966597		0	0	0	0	0
	90	0.852013	0.860813	0.944154	1.14689		0.950968	0.137056	0.942624		30	0.0713438	0.0164341	0.0891453	0.0820533
DF	0	1	1	1	1		1	0	#DIV/0!		60	0.131147	0.109921	0.172755	0.0896711
	30	0.935789	0.982452	0.881441	0.791398		0.89777	0.0820533	0.0650991		90	0.133928	0.133419	0.137056	0.0713022
	60	0.83781	0.861867	0.707854	0.68479		0.77308	0.0896711	0.00816305
	90	0.534152	0.696063	0.622311	0.56447		0.604249	0.0713022	0.00618092
