# Supplementary material for: Characterization of tryptophan oxidation affecting D1 degradation by FtsH in the photosystem II quality control of chloroplasts
Source: eLife journal article supplement (doi:10.7554/elife.88822), 2023-07-26
Supplement: fig5-data1 [file D1 synthesis rate.xlsx]

## Sheet: Sheet1
Pulse labelling		Exp1		Exp2		Exp3		Exp4		Exp5
		imageJ	control(4)=1	imageJ	control(4)=1	imageJ	control(4)=1	imageJ	control(4)=1	imageJ	control(4)=1
Control	0	1081.4	0.0398511	1927.12	0.0639881	1105.51	0.0564118	296.364	0.0419453	585.435	0.0487249
	1	6815.94	0.251178	10803.7	0.358724	4076.62	0.208022	864.749	0.122391	3092.05	0.257347
	2	10315	0.380124	27855.6	0.924915	7677.94	0.39179	2663.45	0.376966	6508.85	0.541722
	4	27136	1	30116.9	1	19597.1	1	7065.49	1	12015.1	1
W14F	0	7065.21	0.260363	2824.37	0.0937801	1476.51	0.0753432	659.263	0.0933075	1117.58	0.0930142
	1	15444.7	0.569158	7865.7	0.261172	3414.38	0.174229	2917.03	0.412856	2986.64	0.248574
	2	25085.3	0.924431	18635	0.618754	6159.2	0.314292	8185.1	1.15846	6596.22	0.548993
	4	28783.6	1.06072	27014.1	0.896974	14422.6	0.735958	12142.5	1.71856	13722.2	1.14208
W317F	0	2337.85	0.0861533	1199.2	0.0398183	2354.65	0.120153	860.728	0.121821	1242.23	0.103389
	1	8041.45	0.296339	3111.78	0.103323	7151.46	0.364925	1146.16	0.16222	4162.2	0.346413
	2	15200	0.560142	7718.07	0.25627	15238.9	0.777613	3035.67	0.429647	8108.29	0.674841
	4	26170.9	0.964436	18353.9	0.609422	22672.5	1.15693	5015.05	0.709796	14761.7	1.22859
W14F W317F	0	3735.12	0.137644	1368.33	0.0454338	3202.35	0.163409	2246.01	0.317885	2413.5	0.200872
	1	9512.64	0.350555	4141.02	0.137498	9481.69	0.483832	6755.44	0.956118	9845.58	0.819433
	2	18817.9	0.693466	8305.31	0.275769	18789.6	0.958797	11461.4	1.62216	13343.9	1.11059
	4	25325.7	0.933288	20509	0.680978	27316.6	1.39391	13346.2	1.88893	15492.6	1.28942
		1	2	3	4	5	Average	SD	T-test				Average	SD
Control	0	0.0398511	0.0639881	0.0564118	0.0419453	0.0487249	0.0501842	0.0100761			Control	0	0.0501842	0.0100761
	1	0.251178	0.358724	0.208022	0.122391	0.257347	0.239532	0.0856954				1	0.239532	0.0856954
	2	0.380124	0.924915	0.39179	0.376966	0.541722	0.523103	0.234969				2	0.523103	0.234969
	4	1	1	1	1	1	1	0				4	1	0
W14F	0	0.260363	0.0937801	0.0753432	0.0933075	0.0930142	0.123162	0.0770946	0.122127		W14F	0	0.123162	0.0770946
	1	0.569158	0.261172	0.174229	0.412856	0.248574	0.333198	0.157831	0.343621			1	0.333198	0.157831
	2	0.924431	0.618754	0.314292	1.15846	0.548993	0.712986	0.330865	0.403152			2	0.712986	0.330865
	4	1.06072	0.896974	0.735958	1.71856	1.14208	1.11086	0.373861	0.543565			4	1.11086	0.373861
W317F	0	0.0861533	0.0398183	0.120153	0.121821	0.103389	0.0942671	0.033701	0.0699857		W317F	0	0.0942671	0.033701
	1	0.296339	0.103323	0.364925	0.16222	0.346413	0.254644	0.115933	0.841427			1	0.254644	0.115933
	2	0.560142	0.25627	0.777613	0.429647	0.674841	0.539703	0.204773	0.93093			2	0.539703	0.204773
	4	0.964436	0.609422	1.15693	0.709796	1.22859	0.933835	0.270659	0.613698			4	0.933835	0.270659
W14F W317F	0	0.137644	0.0454338	0.163409	0.317885	0.200872	0.173049	0.0992265	0.0609814		W14F W317F	0	0.173049	0.0992265
	1	0.350555	0.137498	0.483832	0.956118	0.819433	0.549487	0.336095	0.16453			1	0.549487	0.336095
	2	0.693466	0.275769	0.958797	1.62216	1.11059	0.932157	0.499119	0.252882			2	0.962774	0.505812
	4	0.933288	0.680978	1.39391	1.88893	1.28942	1.23731	0.462002	0.314754			4	1.23731	0.462002
