# Supplementary material for: Characterization of tryptophan oxidation affecting D1 degradation by FtsH in the photosystem II quality control of chloroplasts
Source: eLife journal article supplement (doi:10.7554/elife.88822), 2023-07-26
Supplement: fig6-data1 [file D1 deg x ftsH mutation.xlsx]

## Sheet: Sheet1
HL-chl		1	2	3	4	1	2	3	4	AVERAGE	STDEV	Ttest
Control	0	24379	34122.1	31213.1	26495.7	1	1	1	1	1	0
	90	19627.8	39799.2	33652.2	26343.5	0.805111	1.16638	1.07814	0.994252	1.01097	0.154186
W14F	0	26391.1	34499.8	21998.6	22143	1	1	1	1	1	0
	90	21021.8	25127.8	19205.8	18831	0.796551	0.728345	0.873047	0.850429	0.812093	0.0643955	0.113261	c/w14f
W14FW317F	0	35412.2	26184.3	23690.3	18762.7	1	1	1	1	1	0
	90	19779.4	16386.7	17872.8	14051.2	0.558547	0.625822	0.754434	0.748894	0.671924	0.0961112	0.0165457	c/w317f
W14Fftsh	0	34171	32876.6	31314.6	27017.2	1	1	1	1	1	0
	90	27789.1	26114.8	28902	29757.9	0.813234	0.794328	0.922956	1.10144	0.90799	0.140885	0.166458	w14f/w14fftsh
W14FW317Fftsh	0	35154.3	26907.5	36778.8	23360.4	1	1	1	1	1	0
	90	16689.9	19648.5	38072.6	20262.3	0.474762	0.730223	1.03518	0.867378	0.776885	0.236897	0.253929	DF/DFftsh
HL+chl		1	2	3	4	1	2	3	4	AVERAGE	STDEV	Ttest
Control	0	36838.7	37674.4	39414.9	47117	1	1	1	1	1	0
	90	27588	27492.7	32698.8	36516.5	0.748886	0.729743	0.829607	0.775017	0.770813	0.0433663
W14F	0	33109.8	37803.4	34472.3	38000.2	1	1	1	1	1	0
	90	20038.8	26197.4	21603.3	24575.2	0.605223	0.692992	0.626687	0.646711	0.642903	0.0374439	0.0337986	c/w14f
W14FW317F	0	27037.9	35395.9	31387.8	33425.1	1	1	1	1	1	0
	90	12448.2	12107.2	17495.8	17232.8	0.460398	0.34205	0.557408	0.515566	0.468855	0.093407	0.00192708	c/w317f
W14Fftsh	0	31299.3	23081	23362.5	37437	1	1	1	1	1	0
	90	21773.9	25084.2	20028.9	35379.6	0.695667	1.08679	0.857307	0.945042	0.896201	0.163743	0.0285296	w14f/w14fftsh
W14FW317Fftsh	0	28246	43635.4	35561.9	43396.9	1	1	1	1	1	0
	90	24968.9	38104.2	22809.5	36235	0.883982	0.873241	0.641403	0.834969	0.808399	0.1133	0.0379697	DF/DFftsh
HL-chl		AVERAGE	STDEV			HL+chl		AVERAGE	STDEV
Control	0	1	0			Control	0	1	0
	90	1.01097	0.154186				90	0.770813	0.0433663
W14F	0	1	0			W14F	0	1	0
	90	0.812093	0.0643955				90	0.642903	0.0374439
W14F W317F	0	1	0			W14F W317F	0	1	0
	90	0.671924	0.0961112				90	0.468855	0.093407
W14F ftsh	0	1	0			W14F ftsh	0	1	0
	90	0.90799	0.140885				90	0.896201	0.163743
W14F W317F ftsh	0	1	0			W14F W317F ftsh	0	1	0
	90	0.776885	0.236897				90	0.808399	0.1133
