# Supplementary material for: Characterization of tryptophan oxidation affecting D1 degradation by FtsH in the photosystem II quality control of chloroplasts
Source: eLife journal article supplement (doi:10.7554/elife.88822), 2023-07-26
Supplement: fig8-data1 [file Figure8_source_data.pdf › Fig.8_source_data/Figure8_source_data.pdf]

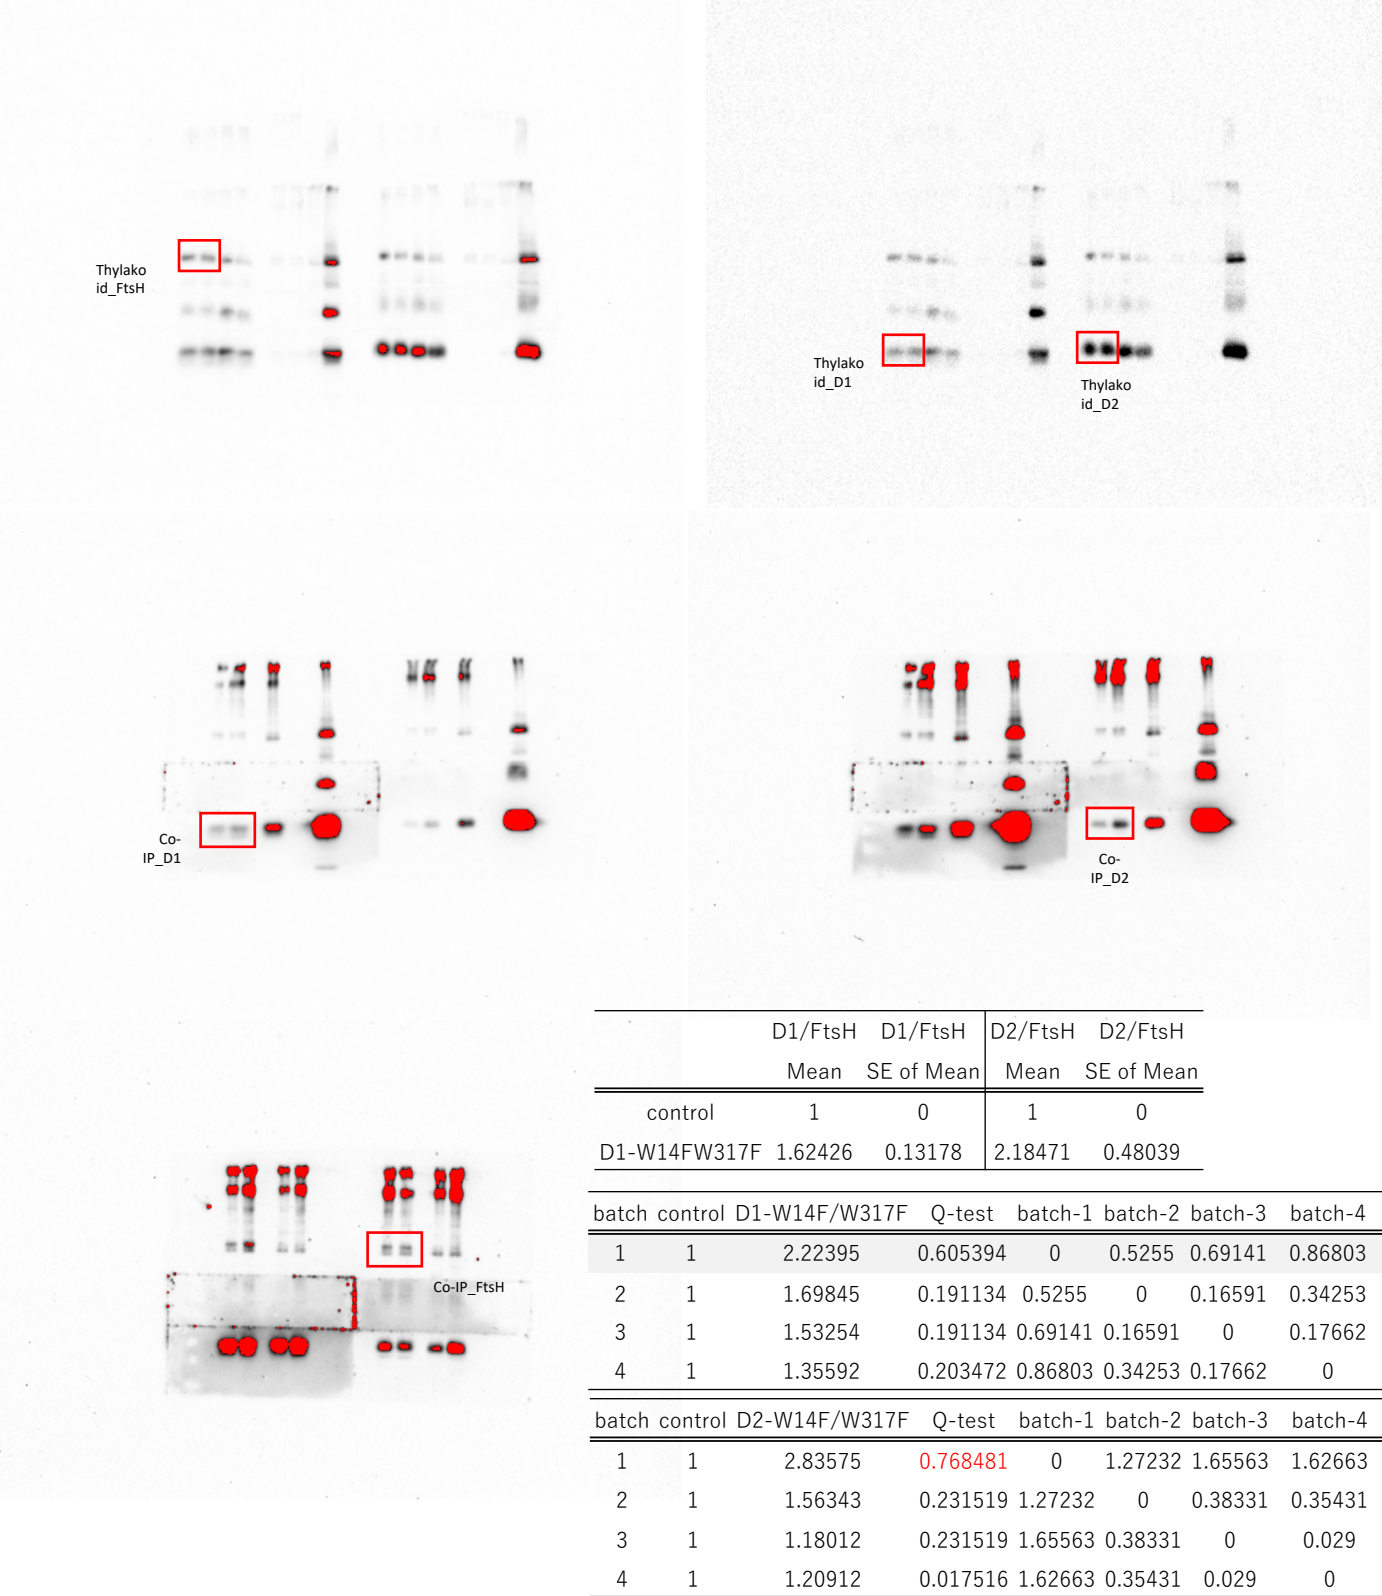

**Figure 8 – figure supplement data 1. Blots and static dataset.**  
 Red rectangles represent for the figure preparation and the table for static analysis from batches of blots are shown.

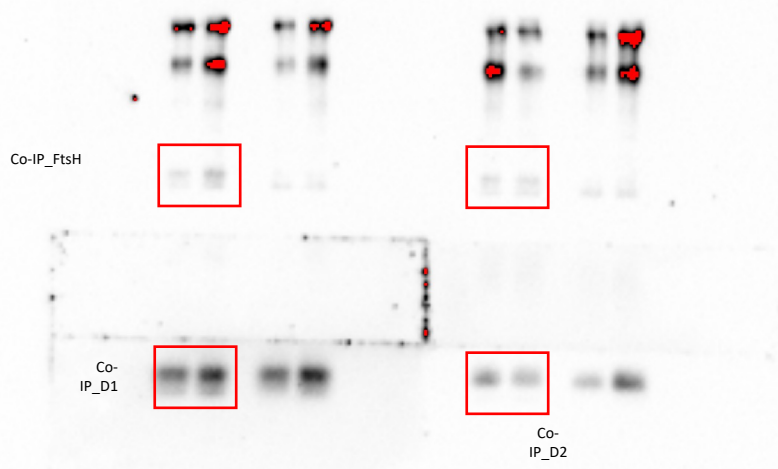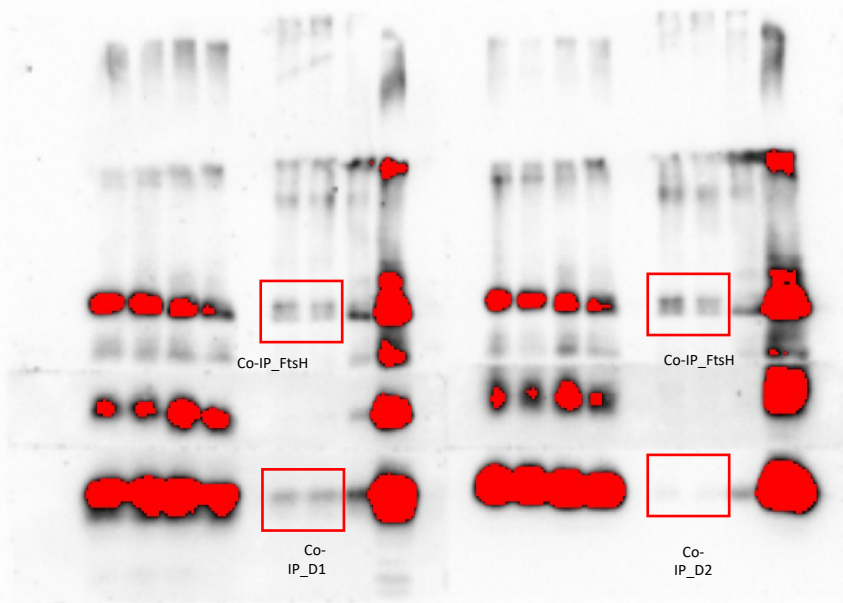

**Figure 8 – figure supplement data 1. Blots and static dataset.**

Red rectangles represent for the figure preparation and the table for static analysis from batches of blots are shown.
