# Supplementary figures and images for: Characterization of tryptophan oxidation affecting D1 degradation by FtsH in the photosystem II quality control of chloroplasts
Source: eLife journal article supplement (doi:10.7554/elife.88822), 2023-07-26

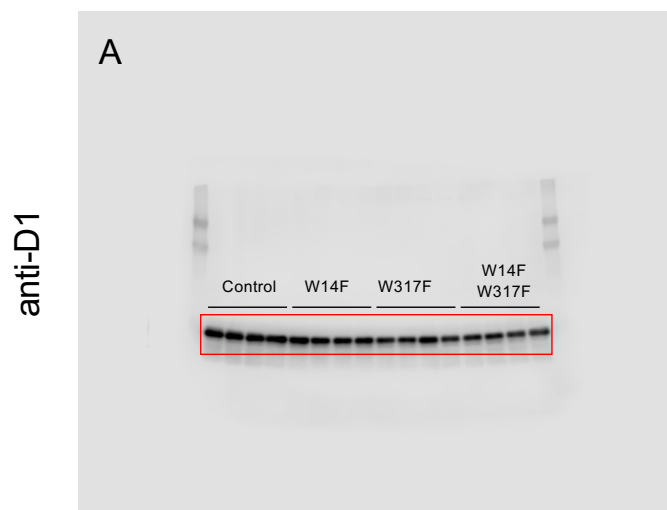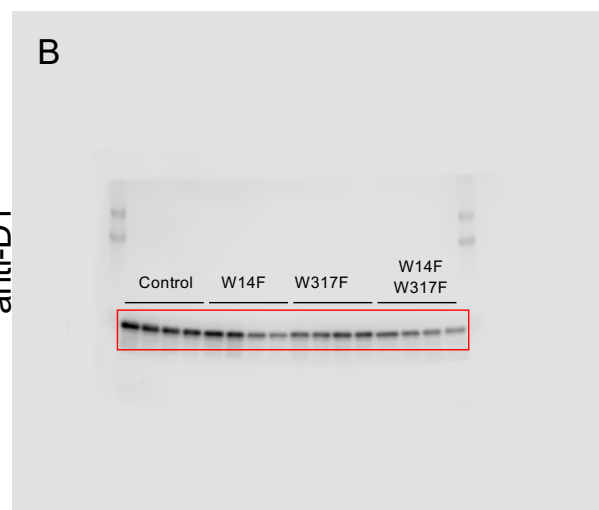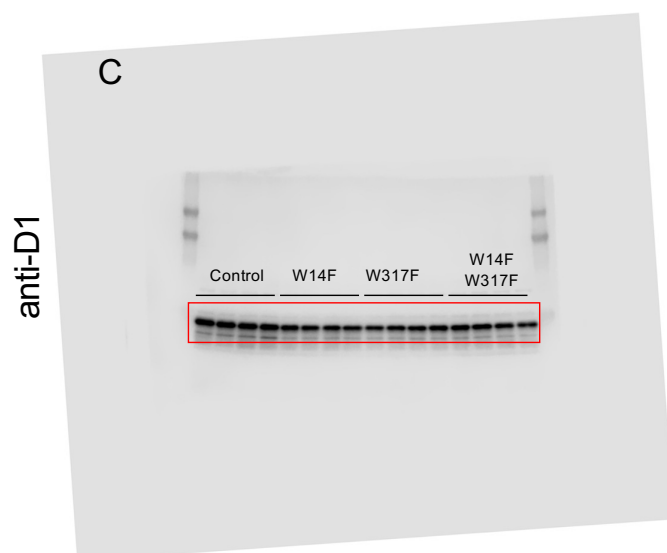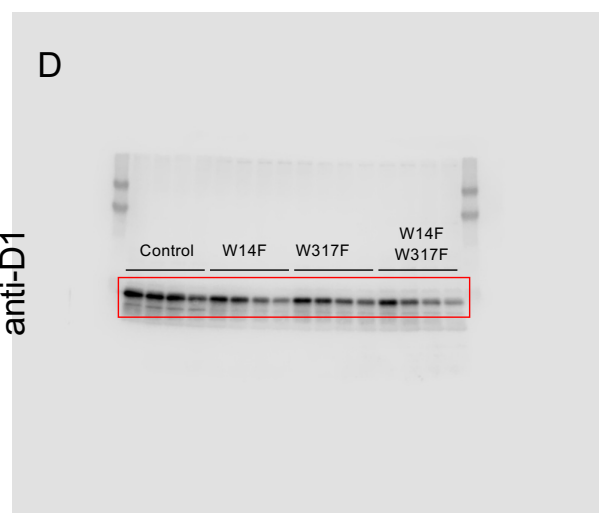

Supplement: fig4-data1 [file elife-88822-fig4-data1-v1.zip]

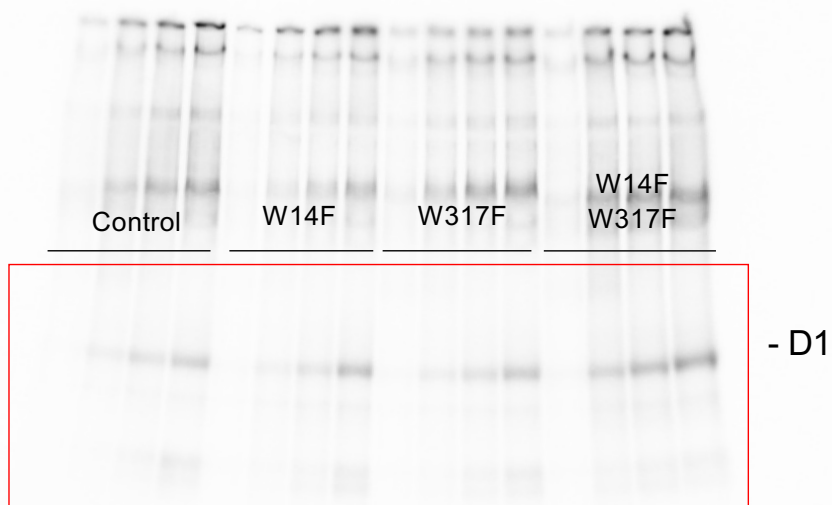

Supplement: fig5-data1 [file labelled_Fig.5_Pulse labeling.pdf › Fig.5_source_data/labelled_Fig.5_Pulse labeling.pdf]

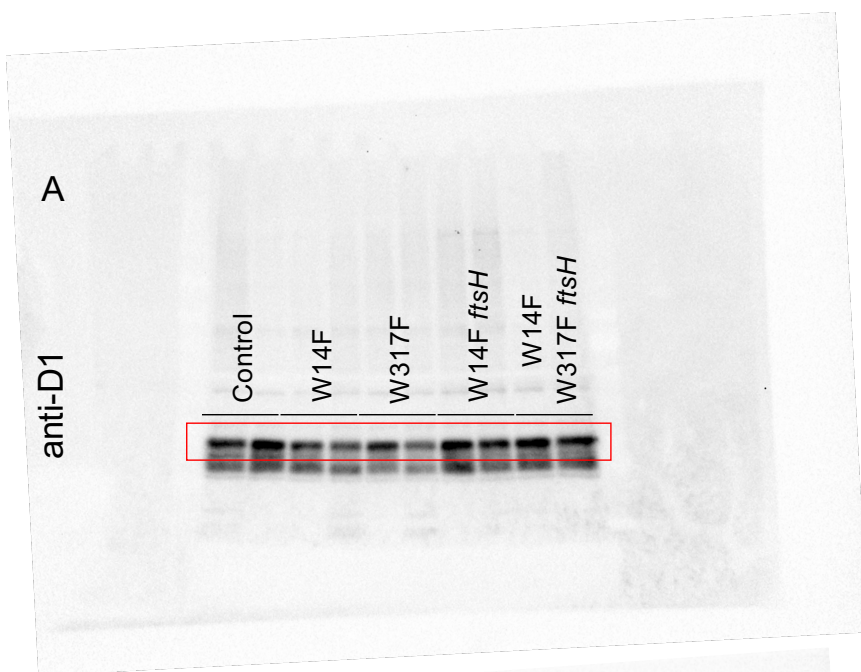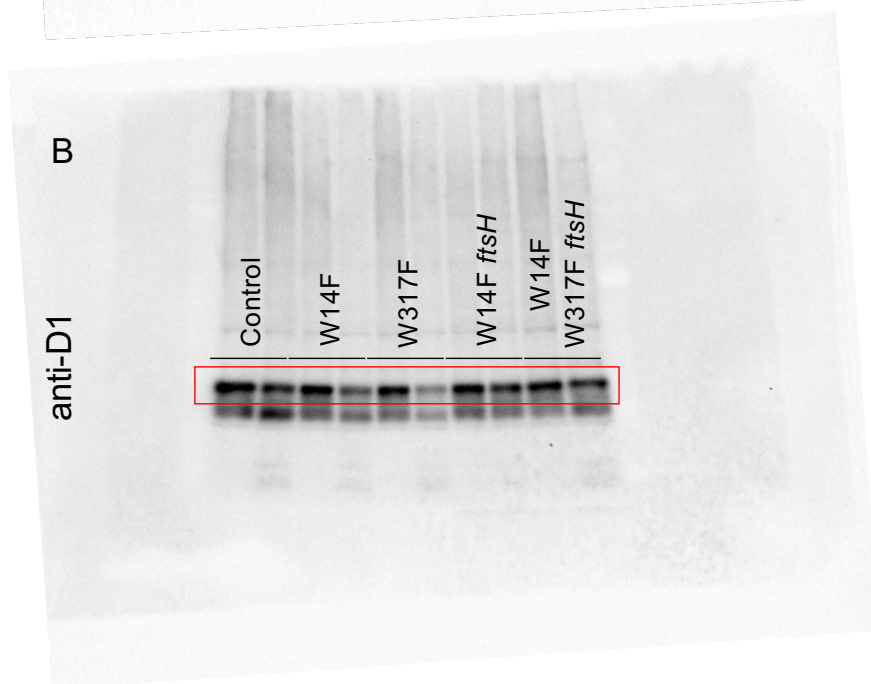

Supplement: fig6-data1 [file elife-88822-fig6-data1-v1.zip]
